# Supplementary material
Source: Springer Nature journal article supplement (http://www.springermedizin.de/resource/supplementary/13054_2011_611_MOESM5_ESM.pdf/9708748)
Supplement: MOESM5 [file 9708748]

| Study or Subgroup                | AOX    |            | Control |            | Weight       | Risk Ratio               | Risk Ratio          |
|----------------------------------|--------|------------|---------|------------|--------------|--------------------------|---------------------|
|                                  | Events | Total      | Events  | Total      |              | M-H, Random, 95% CI      | M-H, Random, 95% CI |
| <b>1.2.1 - Single + Combined</b> |        |            |         |            |              |                          |                     |
| Andrews                          | 104    | 251        | 121     | 251        | 15.1%        | 0.86 [0.71, 1.04]        |                     |
| Angstwurm 2007                   | 10     | 116        | 10      | 122        | 0.8%         | 1.05 [0.45, 2.43]        |                     |
| Berger 2001a                     | 5      | 9          | 5       | 12         | 0.7%         | 1.33 [0.55, 3.24]        |                     |
| Berger 2001b                     | 3      | 11         | 5       | 12         | 0.4%         | 0.65 [0.20, 2.12]        |                     |
| Berger 2008                      | 36     | 102        | 34      | 98         | 4.0%         | 1.02 [0.70, 1.48]        |                     |
| El-Attar 2009                    | 5      | 36         | 7       | 34         | 0.5%         | 0.67 [0.24, 1.92]        |                     |
| Maderazo                         | 13     | 28         | 5       | 18         | 0.8%         | 1.67 [0.72, 3.89]        |                     |
| Manzanares 2011                  | 1      | 15         | 6       | 16         | 0.1%         | 0.18 [0.02, 1.31]        |                     |
| Nathens                          | 36     | 301        | 44      | 294        | 3.4%         | 0.80 [0.53, 1.20]        |                     |
| Porter                           | 5      | 9          | 8       | 9          | 1.5%         | 0.63 [0.33, 1.17]        |                     |
| Preiser                          | 3      | 20         | 1       | 17         | 0.1%         | 2.55 [0.29, 22.31]       |                     |
| <b>Subtotal (95% CI)</b>         |        | <b>898</b> |         | <b>883</b> | <b>27.6%</b> | <b>0.88 [0.76, 1.02]</b> |                     |

Total events

221

246

Heterogeneity:  $\text{Tau}^2 = 0.00$ ;  $\text{Chi}^2 = 9.08$ ,  $\text{df} = 10$  ( $P = 0.52$ );  $I^2 = 0\%$

Test for overall effect:  $Z = 1.73$  ( $P = 0.08$ )
